# Supplementary material for: Reconciling drainage and receiving basin signatures of the Godavari River system
Source: Copernicus journal article supplement (doi:10.5194/bg-2018-23), 2018-02-08
Supplement: Supplementary file 1 [file bg-2018-23-supplement.zip]

### **Supplementary Table Captions:**

**Table S1:** Sample information, results of bulk OC and long-chain fatty acid analysis from the Godavari River basin presented in this study.

**Table S2:** Sample information, results of bulk OC and long-chain fatty acid analysis from the marine sediment core 16A presented in this study.

### **Supplementary Figure Captions:**

**Figure S1:**  $\delta^{13}\text{C}_{\text{LCFA}}$  values of selected soil samples spanning the upper to lower basin. MWA = mean-weighted average  $\delta^{13}\text{C}$  of  $\text{C}_{26-32}$  fatty acids.

**Figure S2:** variations in geochemical properties with soil depth.
