# Supplementary material for: Reconciling drainage and receiving basin signatures of the Godavari River system
Source: Copernicus journal article supplement (doi:10.5194/bg-2018-23), 2018-02-08
Supplement: Supplementary file 1 [file Table S1.xls]

## Sheet: Table 1
Sample id	Latitude (N)	Longtitude (E)	Elevation (masl)	Distance to Shore (km)	Catchment	Type	TOC (%)	δ13COC (‰)	Δ14COC (‰)	MGS (μm)	MSA (m2/g)	OC/MSA (mg/m2)	LCFA Conc. (ug/g OC)	δ13CLCFA (‰)	LCFA/MSA (ug/m2)	ACL
G1	19.9974	76.2834	496	1096.24	Upstream	River Bed Sediment	0.298158	-20.2632	-70.9316	31.52	34.629	0.0861007	n.a.	n.a.	n.a.	n.a.
G2	19.8762	74.513	496	1316.64	Upstream	River Bed Sediment	1.45917	-22.5051	-82.0131	26.42	36.916	0.395268	n.a.	n.a.	n.a.	n.a.
G3	19.6236	75.0248	492	1316.64	Upstream	River Bed Sediment	1	-21.5	-130.781	16.59	41.616	0.240292	n.a.	n.a.	n.a.	n.a.
G14	16.9461	81.7538	10	87.14	Downstream	River Bed Sediment	0.169425	-24.0093	-117.544	649.21	6.758	0.250703	15.6831	-32.8254	0.4641	28.9845
G17	16.6919	81.8039	4	60.9	Downstream	River Bed Sediment	n.a.	-21.9692	-35.3823	573.75	1.563	n.a.	6.22702	-30.0763	1.5936	29.3195
G18	16.452	81.7843	1	27.6	Downstream	River Bed Sediment	0.215184	-24.5473	-78.6549	390.17	4.117	0.522673	n.a.	n.a.	n.a.	n.a.
G19	16.5267	81.9564	3	16.3	Downstream	River Bed Sediment	0.120381	-24.4801	-90.6529	137.34	5.011	0.240234	n.a.	n.a.	n.a.	n.a.
G20	17.6334	81.636	443	204.41	Downstream	River Bed Sediment	0.144597	-25.2444	-151.866	851.75	13.775	0.104971	n.a.	n.a.	n.a.	n.a.
G22	17.8857	81.395	42	246.21	Downstream	River Bed Sediment	0.227978	-24.6272	-62.1071	136.35	6.466	0.35258	n.a.	n.a.	n.a.	n.a.
T4	16.7124	82.3214	1	9.28	Downstream	River Bed Sediment	0.961685	-24.3668	-44.2936	8.01	37.181	0.25865	7.42357	-31.6243	0.2196	28.4862
T5	16.7329	82.3487	0	5.46	Downstream	River Bed Sediment	1.30084	-25.2299	-32.7157	27.4	34.726	0.3746	7.13562	-30.6413	0.2055	28.824
T6	16.7654	82.3577	0	1.61	Downstream	River Bed Sediment	0.436558	-22.6678	-85.7231	116.05	12.279	0.355532	n.a.	n.a.	n.a.	n.a.
G4	19.374	75.7133	448	1139.36	Upstream	River Bank Sediment	0.3	-17.3	-138.434	23.57	30.877	0.0971597	146.345	-25.9798	1.44734	28.4269
G5	19.5685	73.7186	751	1406.59	Upstream	River Bank Sediment	0.8	-19	42.4358	9.51	40.081	0.199596	187.304	-24.8173	3.79758	29.208
G6	19.0946	77.0482	353	887.44	Upstream	River Bank Sediment	0.64494	-20.1797	-114.818	50.1	60.223	0.107092	n.a.	n.a.	n.a.	n.a.
G7a	20.1267	73.7505	789	1437.84	Upstream	River Bank Sediment	1.5	-23.9	50.3614	30.43	18.636	0.804894	66.6519	-30.1152	5.46939	28.7274
G7b	20.1267	73.7505	789	1437.84	Upstream	River Bank Sediment	1.6	-20	97.6156	12.43	31.394	0.509652	77.0066	-26.6131	3.9898	29.0691
G8	19.9723	76.5045	491	1081.6	Upstream	River Bank Sediment	1	-21.6	-45.2273	12.04	38.063	0.262722	182.193	-29.8203	4.86369	29.1203
G9	19.6222	75.026	478	1234.14	Upstream	River Bank Sediment	1.3	-19.9	-108.633	11.5	58.115	0.223694	66.7733	n.a.	1.5019	28.7406
G2	19.8762	74.513	492	1316.64	Upstream	River Bank Sediment	0.7	-20.6	-132.297	24.85	38.989	0.179538	97.8727	n.a.	1.76263	28.5962
G12	20.1062	74.0618	548	1386.84	Upstream	River Bank Sediment	0.7	-20.9	-79.6146	25.3	37.62	0.186071	135.322	-27.1558	2.54565	28.9771
G13, 5-10 cm	19.9866	76.5123	589	1083.43	Upstream	Deep Soil	0.2	-16.1	9.42866	59.2	12.653	0.158065	164.852	-22.417	2.6305	28.4597
G13, 10-20 cm	19.9866	76.5123	589	1083.43	Upstream	Deep Soil	0.2	-16.1	-43.9231	39.76	10.554	0.189502	142.154	-21.1489	2.70461	29.2795
G13, 20-30 cm	19.9866	76.5123	589	1083.43	Upstream	Deep Soil	0.4	-16.6	132.045	24.39	12.698	0.31501	69.9901	-20.8835	2.27377	28.6545
G16, 5-10 cm	20.104	73.7662	726	1434.78	Upstream	Deep Soil	1.1	-17.8	-13.4856	12.76	50.399	0.218258	97.2974	-24.3318	2.19155	28.5991
G16, 10-20 cm	20.104	73.7662	726	1434.78	Upstream	Deep Soil	0.7	-16.9	-22.4344	14.05	49.703	0.140837	55.6971	-22.585	0.796185	28.5373
G16, 20-30 cm	20.104	73.7662	726	1434.78	Upstream	Deep Soil	0.5	-15.6	-72.322	9.15	51.063	0.0979183	98.9627	-20.8309	0.983755	28.6744
G16, 30-40 cm	20.104	73.7662	726	1434.78	Upstream	Deep Soil	0.5	-15.7	-98.9637	8.78	44.965	0.111198	124.336	-20.4764	1.39116	28.6004
G16, 40-46cm	20.104	73.7662	726	1434.78	Upstream	Deep Soil	0.6	-15.3	-120.242	10.08	44.193	0.135768	72.1095	-19.8728	0.985381	28.6735
G11, 5-10 cm	19.8865	73.6985	679	1439.97	Upstream	Deep Soil	1	-14.8	-71.3335	11.38	74.029	0.135082	87.0788	-19.1541	1.17769	28.4134
G11, 10-20 cm	19.8865	73.6985	679	1439.97	Upstream	Deep Soil	1.1	-14.9	-76.4274	8.96	82.846	0.132776	65.825	-18.5769	0.884577	28.3088
G11, 20-30 cm	19.8865	73.6985	679	1439.97	Upstream	Deep Soil	1.1	-15	-64.0886	47.01	55.424	0.19847	4.55034	n.a.	0.0905273	28.0673
G11, 30-40 cm	19.8865	73.6985	679	1439.97	Upstream	Deep Soil	0.6	-14.9	-80.1747	25.46	68.216	0.0879559	49.9037	-19.2641	0.461845	28.2044
G11, 40-50 cm	19.8865	73.6985	679	1439.97	Upstream	Deep Soil	0.2	-16.7	-109.862	25.39	53.327	0.0375045	121.888	-22.798	0.473044	28.7523
G11, 50-56 cm	19.8865	73.6985	679	1439.97	Upstream	Deep Soil	0.2	-18.3	-229.538	10.97	76.205	0.026245	251.5	-18.7629	1.3322	28.4518
G30, 20-32 cm	19.5509	73.7323	784	1406.59	Upstream	Deep Soil	1.7	-14.1	-1.32725	12.56	61.05	0.27846	43.8127	-20.4405	1.15401	28.594
G6, 10-20 cm	19.0946	77.0482	353	887.44	Upstream	Deep Soil	0.3	-18.3	-197.18	19.73	41.667	0.0719994	205.282	-29.9394	1.48482	28.8874
G6, 20-30 cm	19.0946	77.0482	353	887.44	Upstream	Deep Soil	0.3	-18.9	-295.488	10.86	51.192	0.0586029	128.54	-26.4461	0.763905	28.8338
G6, 30-40 cm	19.0946	77.0482	353	887.44	Upstream	Deep Soil	0.2	-17.5	-337.688	17.03	52.92	0.0377929	122.211	-26.3856	0.463165	28.8415
G38, 10-20 cm	19.9974	76.2834	496	1096.24	Upstream	Deep Soil	0.2	-20.5	-73.7388	65.17	24.058	0.0831324	107.443	-30.1784	0.910616	28.9433
G38, 20-30 cm	19.9974	76.2834	496	1096.24	Upstream	Deep Soil	0.1	-17.6	-158.903	128.68	25.849	0.0386862	226.539	-25.1127	0.894799	28.4064
G38, 30-40 cm	19.9974	76.2834	496	1096.24	Upstream	Deep Soil	0.1	-16.4	-229.915	103.65	20.175	0.0495663	31.7379	n.a.	0.16005	28.7385
G46, 10-20 cm	19.9389	73.7275	662	1433.42	Upstream	Deep Soil	0.3	-13.7	-118.256	15.84	37.655	0.0796707	42.2051	-20.8786	0.68259	28.4376
G46, 20-30 cm	19.9389	73.7275	662	1433.42	Upstream	Deep Soil	0.7	-20.8	-98.653	26.46	36.985	0.189266	89.8695	-20.2078	0.974872	28.8785
G46, 30-40 cm	19.9389	73.7275	662	1433.42	Upstream	Deep Soil	0.5	-15.9	-178.366	14.02	31.458	0.158942	106.844	-20.9687	1.03624	28.8808
G39a, 5-10 cm	19.6326	75.0249	475	1234.14	Upstream	Deep Soil	0.3	-20.3	-94.6287	17.75	54.437	0.0551096	263.764	-28.9518	2.68895	29.1802
G39a, 10-22 cm	19.6326	75.0249	475	1234.14	Upstream	Deep Soil	0.6	-21.2	-47.4523	27.39	39.511	0.151856	116.212	-25.9709	0.895699	27.9899
G39b, 10-23 cm	19.6326	75.0249	475	1234.14	Upstream	Deep Soil	0.6	-12.9	-58.7994	47.6	37.266	0.161005	246.907	-28.0198	2.01529	29.1496
G16, 0-5 cm	20.104	73.7662	726	1434.78	Upstream	Surface Soil	1.4	-19	-7.78552	12.45	40.637	0.344514	135.789	-24.7455	3.87862	28.6417
G41, 0-5 cm	20.1056	74.0605	551	1386.84	Upstream	Surface Soil	0.8	-21.5	-16.6184	16.46	27.334	0.292676	125.055	-29.4231	3.79584	29.4101
G11, 0-5 cm	19.8865	73.6985	679	1439.97	Upstream	Surface Soil	1.1	-14.5	25.6342	16.57	59.664	0.184366	102.639	-18.7237	1.84557	28.5401
G30, 0-5 cm	19.5509	73.7323	784	1406.59	Upstream	Surface Soil	1.8	-14.3	22.3296	13.59	64.991	0.276961	85.742	-19.789	1.41225	28.3486
G39, 0-5 cm	19.6326	75.0249	475	1234.14	Upstream	Surface Soil	0.9	-21.3	-49.4998	15.64	49.581	0.181521	72.6455	-29.4974	0.929398	28.8995
G39, 0-10 cm	19.6326	75.0249	475	1234.14	Upstream	Surface Soil	0.4	-13.2	-7.02458	16.66	44.895	0.0890968	110.432	-29.4423	1.49535	28.9238
G45	19.9411	73.7295	724	1433.09	Upstream	Surface Soil	0.4	-13.7	-103.643	18.01	30.187	0.132507	149.66	-18.6185	1.99024	28.6747
G2	19.8762	74.513	492	1316.64	Upstream	Surface Soil	0.4	-15.5	-204.735	37.36	35.644	0.112221	125.087	n.a.	2.48971	28.848
G47	19.8773	74.5175	496	1316.64	Upstream	Surface Soil	1	-14.4	-8.28138	12.62	45.276	0.220868	139.504	-23.8054	1.5543	28.5221
G7	20.1241	73.7554	799	1437.27	Upstream	Surface Soil	1.8	-17.4	49.0059	11.2	45.853	0.392559	116.217	-26.9804	4.6142	28.2282
G9	19.6222	75.026	478	1234.14	Upstream	Surface Soil	0.9	-20.5	-128.687	5.88	80.675	0.111559	74.7743	-30.7167	0.846435	28.8942
G48	19.9763	76.4993	587	1081.81	Upstream	Surface Soil	1.2	-15.5	45.7026	12.7	43.498	0.275875	45.3775	-22.3626	1.2839	28.5661
G8	19.9723	76.5045	491	1081.6	Upstream	Surface Soil	1.5	-22.8	6.38727	14.08	32.523	0.461212	76.4561	-31.1269	3.68175	29.1518
G49	20.1408	73.9727	556	1400.34	Upstream	Surface Soil	0.216901	-18.7485	-24.8911	46.76	35.139	0.0617267	n.a.	n.a.	n.a.	n.a.
G31	18.9018	79.1568	147	566.64	Upstream	Surface Soil	0.734474	-25.2083	-0.299023	970.61	8.726	0.841708	n.a.	n.a.	n.a.	n.a.
G34	19.8158	79.3775	175	647.62	Upstream	Surface Soil	0.221848	-25.6165	-245.135	285.19	10.775	0.205891	7.4466	-31.6128	0.13822	29.3049
G35	19.8647	79.122	171	682.4	Upstream	Surface Soil	0.270982	-19.0103	-76.3621	43.19	24.439	0.110881	n.a.	n.a.	n.a.	n.a.
G36	19.9053	79.115	178	681.79	Upstream	Surface Soil	0.283983	-18.7826	-245.436	20.75	24.296	0.116885	n.a.	n.a.	n.a.	n.a.
G42	20.1291	78.9972	182	716.59	Upstream	Surface Soil	0.753977	-21.7467	-93.2678	11.37	48.006	0.157059	n.a.	n.a.	n.a.	n.a.
G43	19.8159	78.5784	213	758.7	Upstream	Surface Soil	0.25693	-20.8333	-167.859	14.21	64.549	0.0398038	n.a.	n.a.	n.a.	n.a.
G44	18.8614	77.9607	339	736.94	Upstream	Surface Soil	0.669456	-21.4766	-39.8576	20.79	29.376	0.227892	n.a.	n.a.	n.a.	n.a.
X44	19.0135	78.6612	226	638.64	Upstream	Surface Soil	1.16709	-21.4244	0.903989	56.5	25.485	0.457951	3.48319	-27.8123	0.164011	29.0155
X47	19.3983	76.7689	387	946.34	Upstream	Surface Soil	0.450128	-17.9405	-113.672	12.32	45.204	0.099577	n.a.	n.a.	n.a.	n.a.
X48	19.5565	74.9285	486	954.24	Upstream	Surface Soil	0.633139	-23.8892	-64.0317	44.55	30.053	0.210674	n.a.	n.a.	n.a.	n.a.
G10	16.6959	82.0273	6	44.36	Downstream	Surface Soil	0.47217	-24.9271	-26.3288	74.22	14.319	0.329751	11.3429	-31.4061	0.712944	28.8197
G15	16.8935	81.7395	11	85.8	Downstream	Surface Soil	0.236554	-25.0726	-56.3576	141.21	8.903	0.265702	9.48336	-31.4113	0.213037	29.2603
G19	16.5267	81.9564	3	16.3	Downstream	Surface Soil	0.947853	-22.704	-34.9914	14.79	37.168	0.255019	n.a.	n.a.	n.a.	n.a.
G21	17.7216	81.5677	537	254.41	Downstream	Surface Soil	0.822731	-26.2691	-21.1811	157.84	12.844	0.640557	n.a.	n.a.	n.a.	n.a.
G22	17.8857	81.395	42	246.21	Downstream	Surface Soil	0.343584	-22.867	-58.8382	84.24	15.218	0.225775	n.a.	n.a.	n.a.	n.a.
G23	17.5272	81.2932	34	196.61	Downstream	Surface Soil	0.564081	-24.4617	-29.6578	83.19	15.608	0.361405	9.13065	-29.3232	0.350999	28.6616
G24	17.5738	81.2601	37	202.61	Downstream	Surface Soil	0.486678	-24.6798	-31.0722	101.76	11.3	0.430688	7.11486	-31.181	0.566671	29.0728
G25	17.6549	80.9801	44	238.61	Downstream	Surface Soil	0.358466	-21.2176	-143.376	41.23	26.372	0.135927	n.a.	n.a.	n.a.	n.a.
G26	18.8488	80.3491	293	428.71	Downstream	Surface Soil	0.297944	-22.3715	-120.659	110.79	15.064	0.197785	n.a.	n.a.	n.a.	n.a.
G27	19.0143	81.1902	329	610.71	Downstream	Surface Soil	0.617189	-22.5019	-44.3399	75.8	14.156	0.435991	6.81735	-29.6732	0.288953	28.8224
G28	18.3112	80.4676	76	345.71	Downstream	Surface Soil	0.686207	-22.0693	-99.9706	17.36	46.269	0.148308	15.0706	-30.5222	0.228002	29.1087
G29	18.7505	80.0029	128	439.51	Downstream	Surface Soil	0.643807	-22.8919	-51.7752	17.67	30.754	0.209341	5.07866	-29.9826	0.0990828	29.162
G37	19.4209	79.9741	133	534.62	Downstream	Surface Soil	0.292856	-24.535	-37.8513	37.76	15.007	0.195146	13.6778	-31.3669	0.273428	29.2935
G40	20.484	79.9443	208	705.92	Downstream	Surface Soil	0.700563	-25.2787	8.59635	26.86	18.678	0.375074	n.a.	n.a.	n.a.	n.a.
G32	18.8673	79.9504	111	457.62	Downstream	Surface Soil	0.326198	-18.246	-142.211	23.71	23.775	0.137202	n.a.	n.a.	n.a.	n.a.
G33	18.8739	79.85	127	460.64	Downstream	Surface Soil	0.71929	-20.5734	-103.645	13.39	34.058	0.211196	n.a.	n.a.	n.a.	n.a.
