# Supplementary material for: Reconciling drainage and receiving basin signatures of the Godavari River system
Source: Copernicus journal article supplement (doi:10.5194/bg-2018-23), 2018-02-08
Supplement: Supplementary file 2 [file Table S2.xlsx]

## Sheet: Core 16A
Latitude (°N)	Longitude (°E)	Elevation (masl)	Sample Depth	Description	GS (μm)	MSA (m2/g)	TOC (%)	δ13COC (‰)	F14C	+- (abs.)	Age (y)	+-(y)	Δ14COC (‰)	OC/SA (mg/m2)	LCFA Conc. (μg/g OC)	LCFA/SA (μg/m2)	Δ (‰)	Estimated Calendar Age (yrBP)*
16.5933	82.6835	-1268	16A-24-29 cm	Late Holocene	4.54	58.14	1.20035	-18.49	0.80064	0.00851453	1786.07	85.4273	-205.536	0.206458	142.529	2.45148	-194.003	180
16.5933	82.6835	-1268	16A-33-37 cm	Late Holocene	4.35	61.037	1.26448	-18.4466	0.790713	0.00741415	1886.3	75.321	-215.387	0.207167	173.775	2.84704	-194.556	260
16.5933	82.6835	-1268	16A-42-46 cm	Late Holocene	4.06	68.358	1.33229	-18.5573	0.788099	0.00746813	1912.9	76.1211	-217.981	0.194899	n.a.	n.a.	-181.028	300
16.5933	82.6835	-1268	16A-46-51 cm	Late Holocene	4.36	63.397	1.30343	-18.65	0.785032	0.00729561	1944.22	74.6532	-221.024	0.205598	183.213	2.88993	-182.713	320
16.5933	82.6835	-1268	16A-51-58 cm	Late Holocene	4.22	56.527	1.32325	-18.42	0.787535	0.00758894	1918.64	77.4078	-218.54	0.234091	181.689	3.2142	-181.409	390
16.5933	82.6835	-1268	16A-62-70 cm	Late Holocene	4.39	58.764	1.36806	-18.5684	0.782252	0.00978841	1972.72	100.517	-223.783	0.232805	226.08	3.84725	-176.906	460
16.5933	82.6835	-1268	16A-73-78 cm	Late Holocene	4.32	67.582	1.35744	-18.3359	0.785101	0.00763768	1943.51	78.1465	-220.955	0.200858	165.834	2.45382	-179.311	590
16.5933	82.6835	-1268	16A-82-86 cm	Late Holocene	4.52	66.177	1.31528	-18.5998	0.771687	0.00801673	2081.94	83.4507	-234.266	0.198752	247.924	3.74637	-187.369	620
16.5933	82.6835	-1268	16A-86-92 cm	Late Holocene	4.52	66.963	1.29487	-18.381	0.758188	0.00731538	2223.7	77.5057	-247.66	0.193371	209.317	3.12586	-187.928	660
16.5933	82.6835	-1268	16A-92-96 cm	Late Holocene	4.52	53.587	1.35718	-18.66	0.755499	0.00707425	2252.24	75.2177	-250.329	0.253267	264.228	4.93082	-182.702	700
16.5933	82.6835	-1268	16A-101-106 cm	Late Holocene	4.28	59.697	1.37099	-18.5179	0.755927	0.00718512	2247.69	76.3532	-249.904	0.229658	131.652	2.20533	-175.549	780
16.5933	82.6835	-1268	16A-106-111 cm	Late Holocene	4.41	55.723	1.37041	-18.54	0.747369	0.00700619	2339.16	75.3045	-258.396	0.245932	197.383	3.54222	-186.184	820
16.5933	82.6835	-1268	16A-111-118 cm	Late Holocene	4.52	62.523	1.40173	-18.6664	0.750171	0.0072361	2309.09	77.4851	-255.616	0.224195	181.7	2.90614	-175.751	840
16.5933	82.6835	-1268	16A-121-126cm	Late Holocene	4.52	56.833	1.41236	-18.5161	0.755951	0.0072447	2247.44	76.984	-249.88	0.24851	188.522	3.31712	-153.987	980
16.5933	82.6835	-1268	16A-126-135 cm	Late Holocene	4.63	59.167	1.40313	-18.82	0.753439	0.00693227	2274.18	73.9096	-252.373	0.237148	519.385	8.77829	-171.605	1000
16.5933	82.6835	-1268	16A-161-166 cm	Late Holocene	4.59	63.687	1.38779	-18.2368	0.713537	0.0074007	2711.29	83.3164	-291.968	0.217908	304.188	4.77629	-183.123	1180
16.5933	82.6835	-1268	16A-180-185 cm	Late Holocene	4.47	57.302	1.42783	-18.5	0.721567	0.00740296	2621.39	82.4143	-283.999	0.249176	242.342	4.22921	-177.569	1240
16.5933	82.6835	-1268	16A-185-188 cm	Late Holocene	3.97	68.343	1.36571	-18.318	0.715964	0.00718568	2684	80.6214	-289.559	0.199831	147.871	2.16367	-169.552	1280
16.5933	82.6835	-1268	16A-204-208 cm	Late Holocene	4.32	66.235	1.51831	-18.3205	0.714668	0.00693028	2698.56	77.8969	-290.845	0.229231	511.776	7.72667	-176.849	1320
16.5933	82.6835	-1268	16A-229-234 cm	Late Holocene	4.23	64.848	1.61993	-18.6091	0.703783	0.00676163	2821.84	77.1767	-301.646	0.249804	208.781	3.21954	-176.682	1390
16.5933	82.6835	-1268	16A-234-239 cm	Late Holocene	4.18	66.821	1.58316	-18.4654	0.707684	0.00691034	2777.44	78.4392	-297.775	0.236926	141.695	2.12052	-171.36	1430
16.5933	82.6835	-1268	16A, 260-268 cm	Late Holocene	4.2	67.141	1.63861	-18.4054	0.701502	0.00669115	2847.93	76.6206	-303.91	0.244055	152.265	2.26784	-179.202	1590
16.5933	82.6835	-1268	16A, 280-287 cm	Late Holocene	4.54	63.481	1.72732	-18.7753	0.676487	0.00654996	3139.6	77.7773	-328.731	0.272101	190.246	2.9969	-164.094	1709
16.5933	82.6835	-1268	16A-307-311 cm	Late Holocene	4.11	63.725	1.74287	-18.6258	0.655012	0.00634221	3398.74	77.7795	-350.041	0.273498	188.906	2.96439	-181.8	1830
16.5933	82.6835	-1268	16A-329-334 cm	Late Holocene	4.82	67.279	1.5	n.a.	0.673461	0.00712316	3175.61	84.9637	-331.734	0.222952	149.963	2.22897	-157.351	2100
16.5933	82.6835	-1268	16A-334-339 cm	Late Holocene	4.83	64.741	1.87724	-19.18	0.655636	0.00679121	3391.09	83.2066	-349.421	0.289962	111.283	1.71889	-155.971	2125
16.5933	82.6835	-1268	16A-353-359 cm	Late Holocene	5.05	62.831	1.81233	-19.2689	0.65604	0.00751572	3386.15	92.0267	-349.021	0.288446	85.3644	1.35864	-140.428	2380
16.5933	82.6835	-1268	16A-382-389 cm	Late Holocene	4.68	64.712	1.86434	-19.3	0.632865	0.00626861	3675.05	79.5673	-372.017	0.288099	103.66	1.60187	-141.489	2750
16.5933	82.6835	-1268	16A-389-394cm	Late Holocene	4.36	65.016	1.86229	-19.2	0.617643	0.00624462	3870.62	81.2161	-387.122	0.286436	124.766	1.91901	-138.061	2790
16.5933	82.6835	-1268	16A-406-411 cm	Late Holocene	4.81	62.47	1.92429	-19.2272	0.622349	0.00625209	3809.65	80.6985	-382.452	0.308035	396.124	6.34102	-122.486	3000
16.5933	82.6835	-1268	16A-411-415 cm	Late Holocene	4.94	56.559	1.96319	-19.68	0.614067	0.00607759	3917.26	79.5041	-390.67	0.347104	138.633	2.45113	-109.559	3100
16.5933	82.6835	-1268	16A-428-434 cm	Late Holocene	5.14	59.36	1.96649	-19.35	0.616149	0.00630659	3890.08	82.221	-388.604	0.331282	82.7197	1.39353	-117.061	3240
16.5933	82.6835	-1268	16A-455-460 cm	Late Holocene	5.02	66.206	1.92354	-19.88	0.583938	0.00593717	4321.4	81.6746	-420.567	0.290538	133.434	2.01543	-106.196	3650
16.5933	82.6835	-1268	16A-472-477 cm	Late Holocene	4.72	60.63	1.96537	-19.7899	0.565829	0.00646753	4574.46	91.8179	-438.536	0.324158	199.309	3.28729	-86.458	4040
16.5933	82.6835	-1268	16A, 493-500 cm	Late Holocene	4.85	61.87	2.03203	-19.7193	0.536071	0.00591944	5008.44	88.7018	-468.065	0.328436	131.189	2.12039	-83.0199	4360
16.5933	82.6835	-1268	16A-512-516 cm	Late Holocene	4.33	68.778	2.14505	-19.17	0.545892	0.00610239	4862.61	89.798	-458.319	0.31188	76.8238	1.11698	-67.1128	4700
16.5933	82.6835	-1268	16A, 516-520 cm	Early Holocene	4.42	72.423	2.08482	-19.17	0.529716	0.00606366	5104.23	91.9529	-474.37	0.287867	163.071	2.25165	-67.1616	4780
16.5933	82.6835	-1268	16A-532-539 cm	Early Holocene	5.05	63.014	2.09071	-19.88	0.536207	0.00564662	5006.41	84.5921	-467.93	0.331785	138.438	2.19694	-42.1823	4940
16.5933	82.6835	-1268	16A-562-569 cm	Early Holocene	4.94	58.28	2.05355	-20.5566	0.518527	0.00566778	5275.73	87.8042	-485.473	0.35236	140.739	2.41487	-26.1588	5300
16.5933	82.6835	-1268	16A-584-589 cm	Early Holocene	5.11	57.839	2.01881	-20.52	0.504192	0.00551351	5500.93	87.8427	-499.697	0.34904	127.914	2.21155	-29.9449	5680
16.5933	82.6835	-1268	16A-615-618 cm	Early Holocene	4.1	59.421	1.97942	-20.597	0.472253	0.00515474	6026.62	87.681	-531.39	0.333119	48.7329	0.82013	-2.77114	6280
16.5933	82.6835	-1268	16A-618-622 cm	Early Holocene	4.68	64.354	1.94903	-20.429	0.473612	0.00560731	6003.55	95.1055	-530.042	0.30286	73.5654	1.14314	-8.88039	6380
16.5933	82.6835	-1268	16A, 656-659 cm	Early Holocene	4.42	62.059	1.92408	-20.61	0.447331	0.00521021	6462.15	93.5622	-556.12	0.310041	151.045	2.4339	16.7622	7100
16.5933	82.6835	-1268	16A-659-662 cm	Early Holocene	4.64	58.987	1.94539	-20.82	0.430918	0.00519867	6762.41	96.9106	-572.406	0.329801	105.979	1.79666	20.5725	7240
16.5933	82.6835	-1268	16A-681-684 cm	Early Holocene	5.15	65.271	1.79663	n.a.	0.407135	0.00286141	7218.47	56.4567	-596.006	0.275257	169.961	2.60393	38.0298	7800
16.5933	82.6835	-1268	16A-684-688 cm	Early Holocene	4.54	63.87	1.83405	n.a.	0.415869	0.00485618	7047.97	93.802	-587.339	0.287154	158.693	2.48463	52.0899	7900
16.5933	82.6835	-1268	16A-704-709 cm	Early Holocene	4.9	63.278	1.63666	n.a.	0.356067	0.00470508	8295.1	106.147	-646.68	0.258646	208.449	3.29418	-21.5028	8400
				n.a: not available
