# Supplementary figures and images for: Reconciling drainage and receiving basin signatures of the Godavari River system
Source: Copernicus journal article supplement (doi:10.5194/bg-2018-23), 2018-02-08

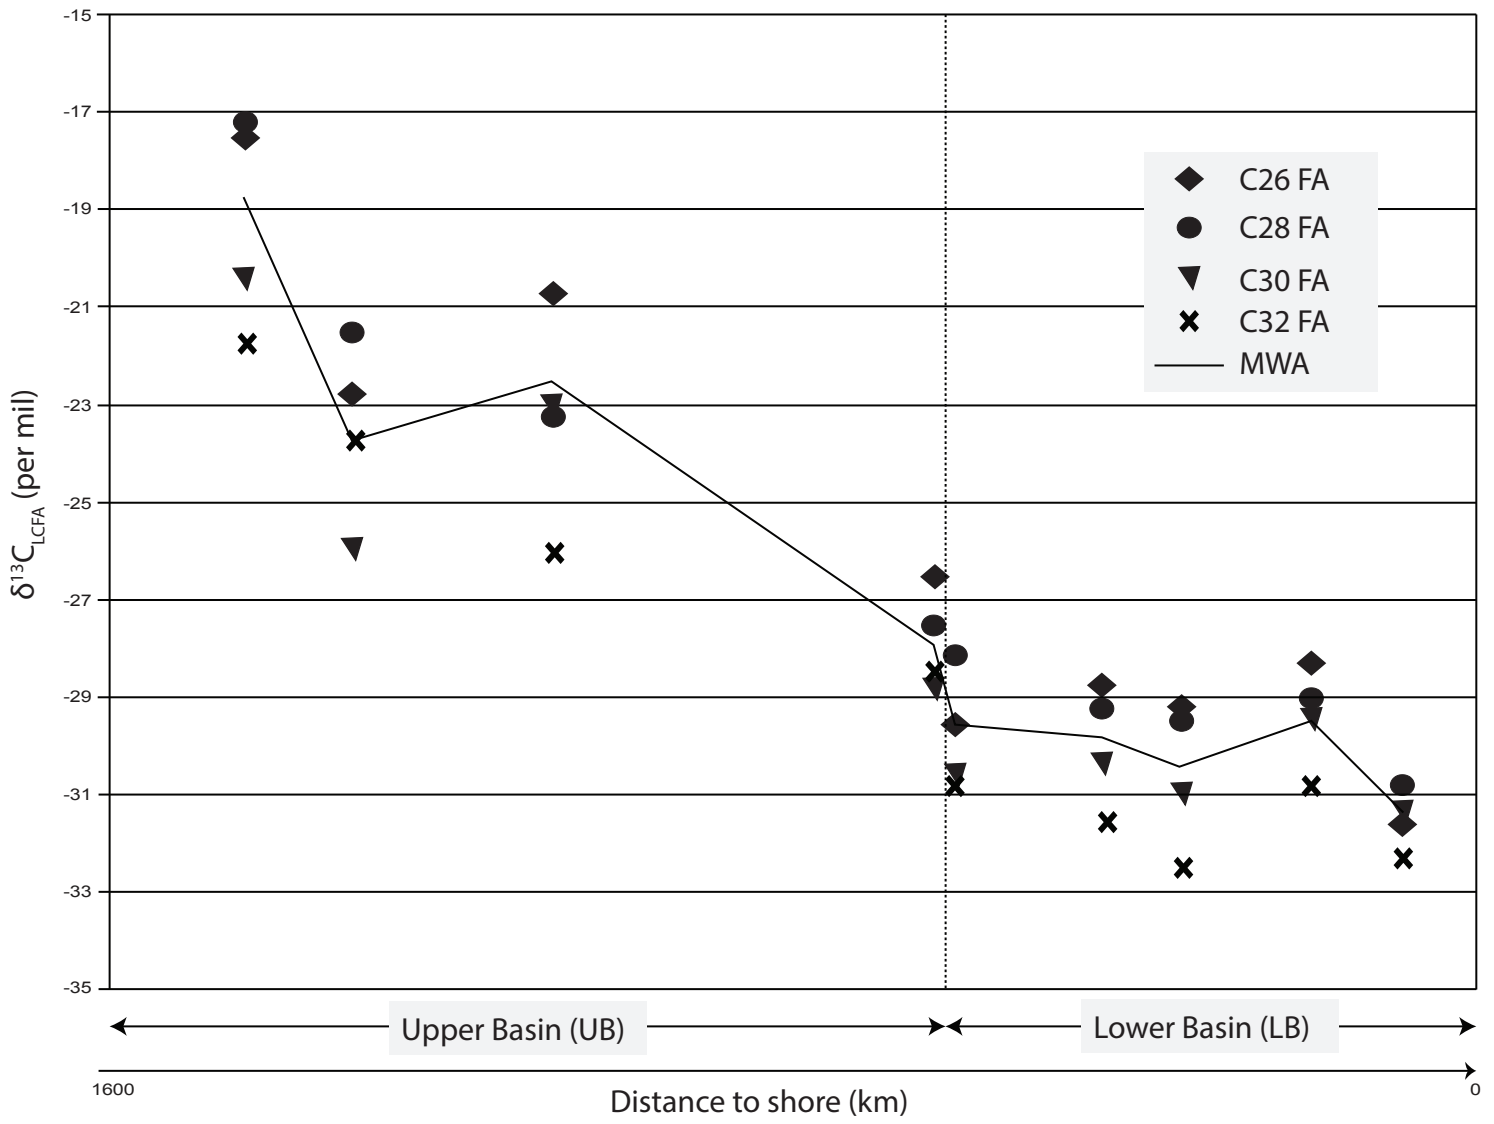

Supplement: Supplementary file 2 [file bg-2018-23-supplement.zip]

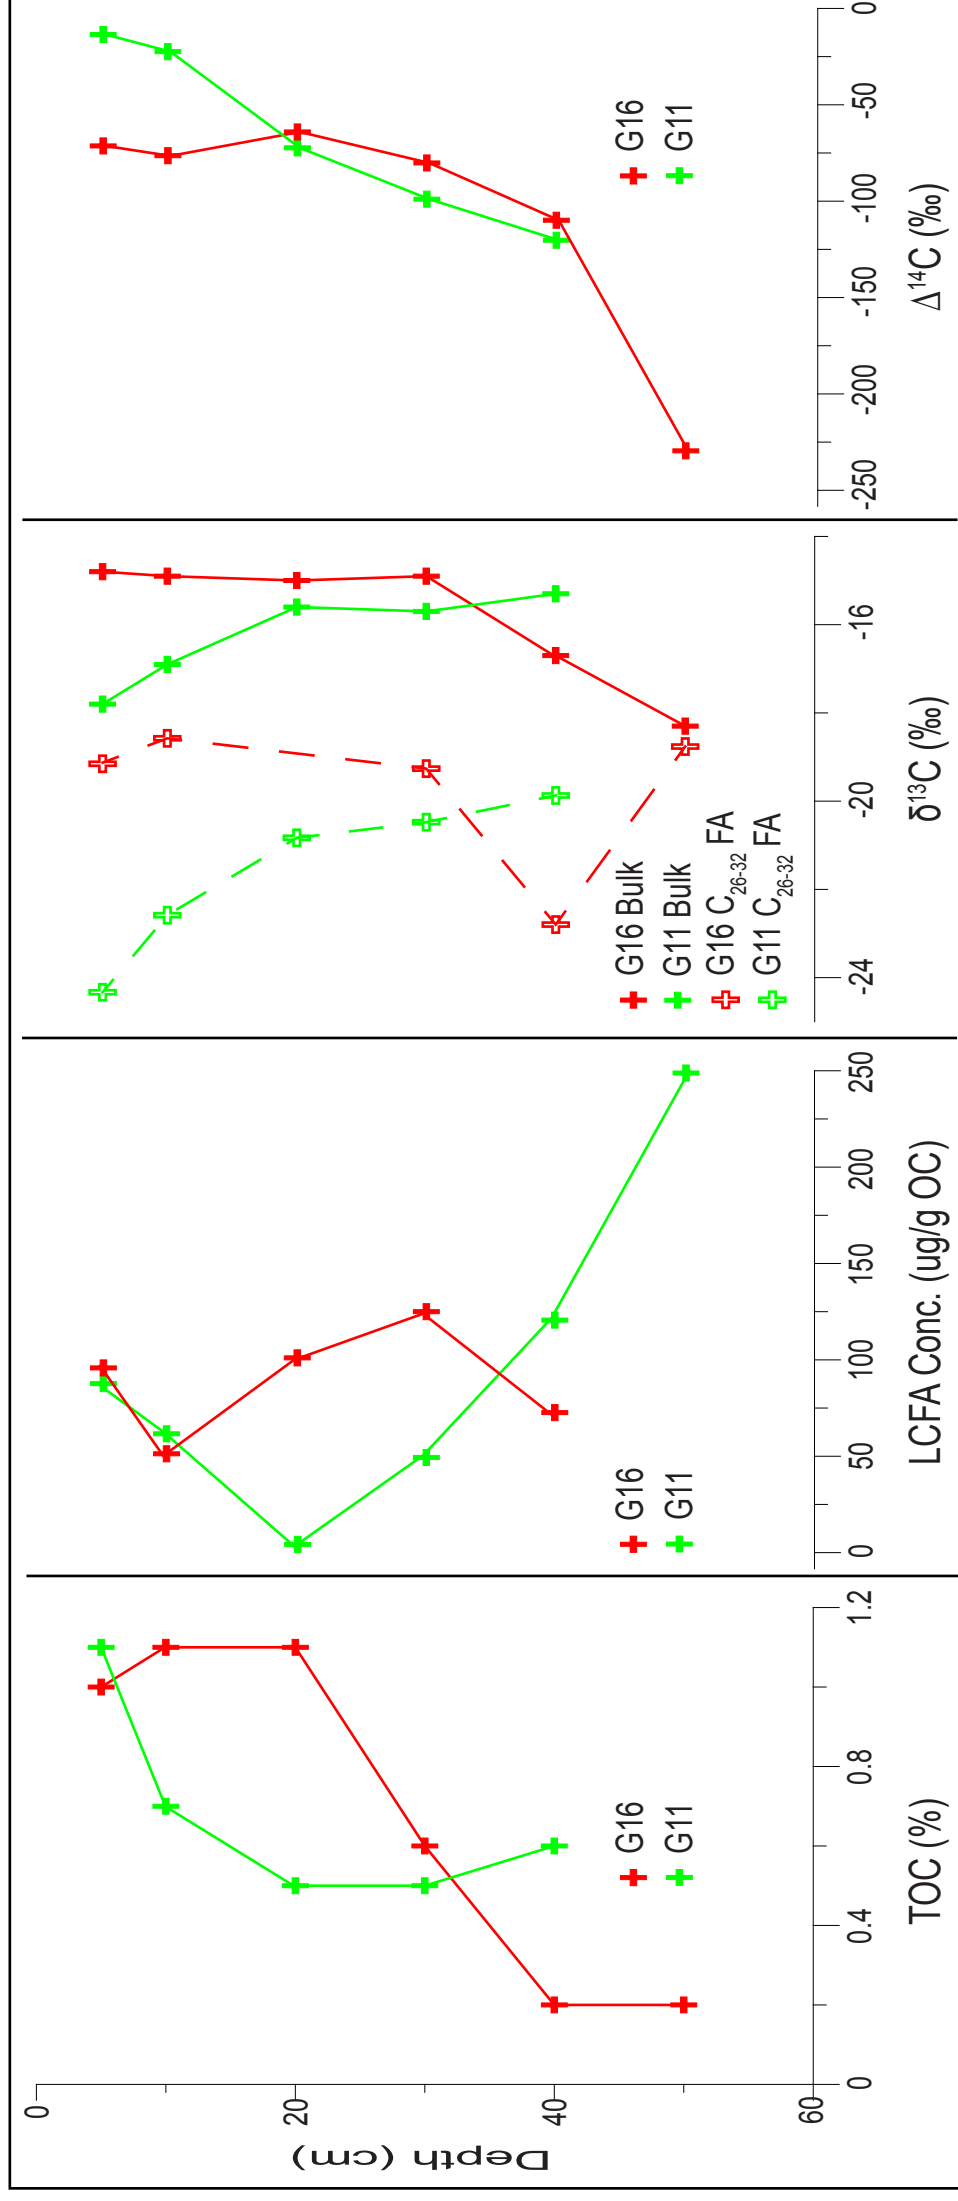

Supplement: Supplementary file 3 [file bg-2018-23-supplement.zip]
